# Supplementary material
Source: Springer Nature journal article supplement (https://www.springermedizin.de/resource/supplementary/12984_2005_60_MOESM3_ESM.pdf/9605218)

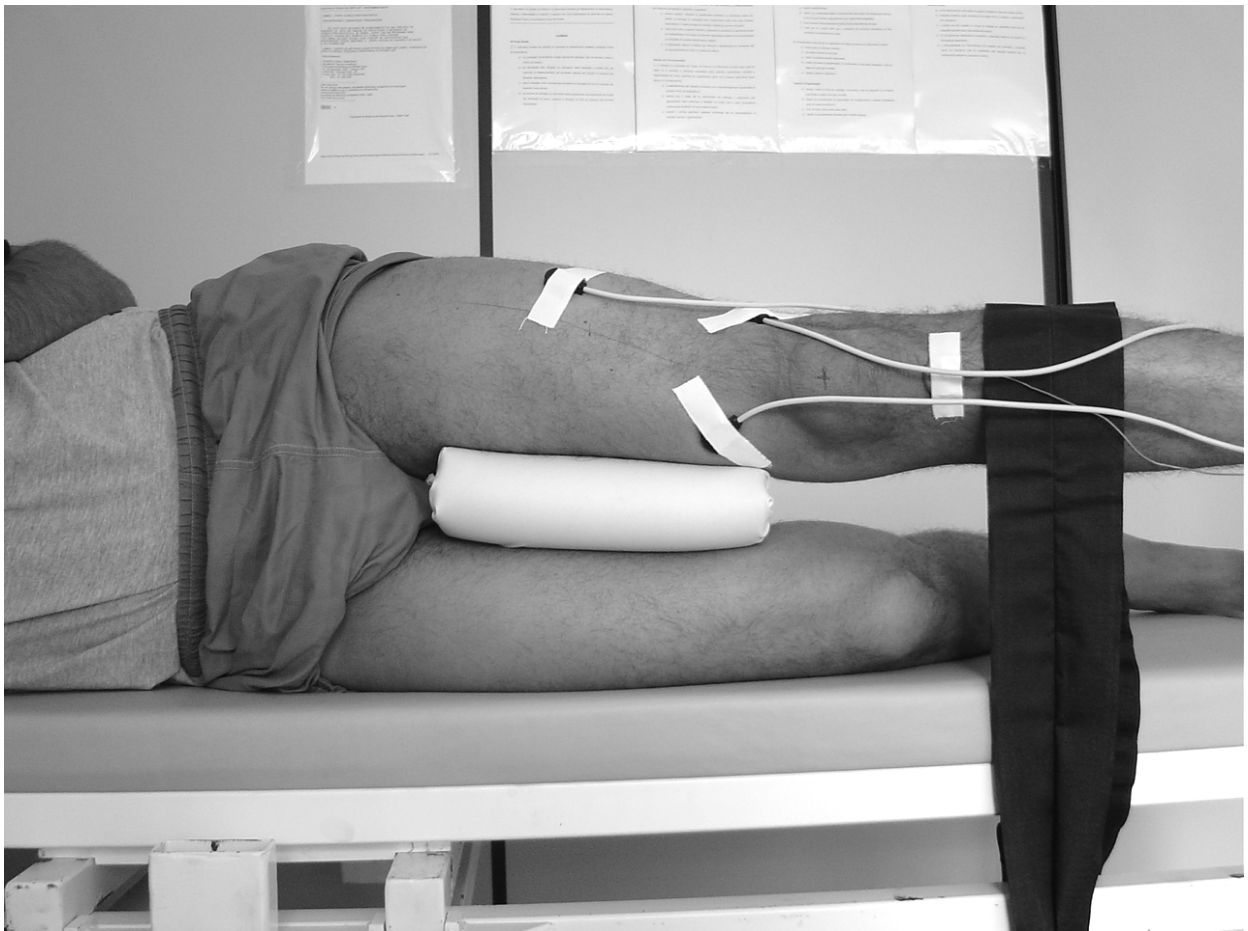

Supplement: MOESM3 [file 9605218]
